# Supplementary material for: Altered Adipogenesis in Zebrafish Larvae Following High Fat Diet and Chemical Exposure Is Visualised by Stimulated Raman Scattering Microscopy
Source: MDPI journal article supplement (doi:10.3390/ijms18040894), 2017-04-24
Supplement: s1 [file s1]

# Altered Adipogenesis in Zebrafish Larvae Following High Fat Diet and Chemical Exposure Is Visualised by Stimulated Raman Scattering Microscopy

Marjo J. den Broeder, Miriam J. B. Moester, Jorke H. Kamstra, Peter H. Cenijn, Valentina Davidoiu, Leonie M. Kamminga, Freek Ariese, Johannes F. de Boer and Juliette Legler

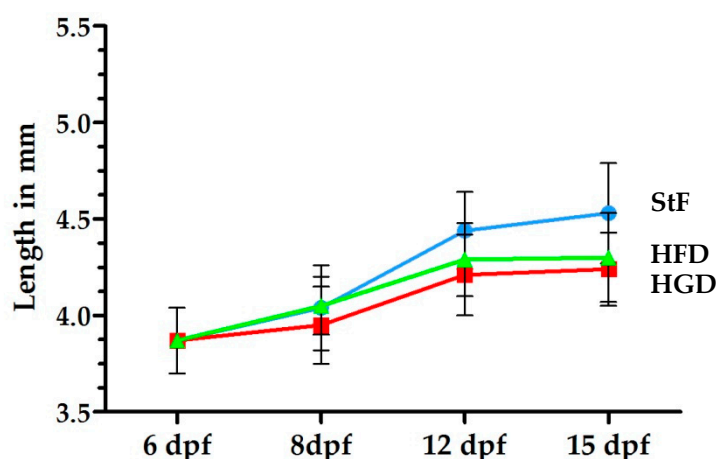

Figure S1. Growth curve from larvae fed with different caloric diets. Standard Length (mm) measurement at selected time points during zebrafish larval development. Larvae were fed with standard diet (StF), high glucose diet (HGD) or high fat diet (HFD). Error bars represent Standard Deviation.

Table S1. Overview of all adipocyte measurements of fish exposed to different diets. All images made with SRS imaging can be found in the supplementary materials.

|     | average number of adipocytes | average volume per fish in pL |
|-----|------------------------------|-------------------------------|
| StF | 2.0                          | 76                            |
| HGD | 1.5                          | 14                            |
| HFD | 5.0                          | 132                           |

| FISH ID | number of adipocytes | adipocyte volume in pL | approximate diameter in $\mu\text{m}$ | total volume per fish in pL |
|---------|----------------------|------------------------|---------------------------------------|-----------------------------|
| StF 1   | 3                    | 29                     | 38                                    | 281                         |
|         |                      | 77                     | 53                                    |                             |
|         |                      | 174                    | 69                                    |                             |
| StF 2   | 2                    | 5                      | 21                                    | 45                          |
|         |                      | 40                     | 42                                    |                             |
| StF 3   | 3                    | 1                      | 13                                    | 34                          |
|         |                      | 25                     | 36                                    |                             |
|         |                      | 8                      | 25                                    |                             |
| StF 4   | 2                    | 28                     | 38                                    | 39                          |
|         |                      | 11                     | 28                                    |                             |
| StF 5   | 2                    | 37                     | 41                                    | 39                          |
|         |                      | 2                      | 17                                    |                             |
| StF 6   | 1                    | 82                     | 54                                    | 82                          |
| StF 7   | 1                    | 9                      | 26                                    | 9                           |

|       |   |      |    |     |
|-------|---|------|----|-----|
| HGD 1 | 1 | 26   | 37 | 26  |
| HGD 2 | 1 | 27   | 37 | 27  |
| HGD 3 | 1 | 0.1  | 5  | 0.1 |
| HGD 4 | 2 | 8    | 25 | 11  |
|       |   | 2    | 16 |     |
| HGD 5 | 1 | 0.1  | 6  | 0.1 |
| HGD 6 | 3 | 0.3  | 8  | 20  |
|       |   | 2    | 14 |     |
|       |   | 19   | 33 |     |
| HFD 1 | 5 | 0.3  | 9  | 98  |
|       |   | 1    | 13 |     |
|       |   | 58   | 48 |     |
|       |   | 30   | 39 |     |
|       |   | 9    | 26 |     |
| HFD 2 | 3 | 6    | 23 | 13  |
|       |   | 3    | 18 |     |
|       |   | 3    | 19 |     |
| HFD 3 | 2 | 10   | 26 | 24  |
|       |   | 15   | 30 |     |
| HFD 4 | 6 | 3    | 17 | 232 |
|       |   | 0.1  | 5  |     |
|       |   | 128  | 63 |     |
|       |   | 6    | 22 |     |
|       |   | 90   | 56 |     |
|       |   | 6    | 22 |     |
| HFD 5 | 8 | 23   | 36 | 208 |
|       |   | 2    | 16 |     |
|       |   | 22   | 35 |     |
|       |   | 68   | 51 |     |
|       |   | 52   | 46 |     |
|       |   | 11   | 27 |     |
|       |   | 30   | 39 |     |
|       |   | 1    | 12 |     |
| HFD 6 | 3 | 7    | 24 | 38  |
|       |   | 0.7  | 11 |     |
|       |   | 30   | 39 |     |
| HFD 7 | 8 | 12   | 28 | 308 |
|       |   | 7    | 23 |     |
|       |   | 191  | 71 |     |
|       |   | 0.4  | 9  |     |
|       |   | 0.04 | 4  |     |
|       |   | 67   | 50 |     |
|       |   | 28   | 38 |     |
|       |   | 3    | 17 |     |

Table S2. Information about the genes selected for the obesity array.

| ENSDARG            | GENE code ZFIN       | NM             | Target gene    | Oligo sequence forward  | Oligo sequence reverse    |
|--------------------|----------------------|----------------|----------------|-------------------------|---------------------------|
| ENSDARG00000027740 | ZDB-GENE-041010-89   | NM_214715.2    | adcyap1b       | GATGCACCTACAGCGGCTACT   | ATCATGTCCAAAAGCCAGGT      |
| ENSDARG00000100086 | ZDB-GENE-060825-220  | NM_001045425.2 | adipob         | CCCATAGAGAGCAGCATGTC    | GCTCTGATTCTCTCAGTG        |
| ENSDARG00000007490 | ZDB-GENE-081022-145  | NM_001128689.1 | adip1          | TCA TCGTA TCTCTGGGTGC   | TGCAATTACGACACAGGTCT      |
| ENSDARG00000069089 | ZDB-GENE-040817-1    | NM_009303347.1 | agrp           | GGCTGGTTTGTGTGAATGT     | TTTCAAGGTGCTCATTTCA       |
| ENSDARG00000040298 | ZDB-GENE-030131-1263 | NM_00109861.1  | apob4b         | AATGACAGAGGAACCGTCA     | GCTCCCTCAGCATCTCAGTC      |
| ENSDARG0000018817  | ZDB-GENE-000412-1    | NM_131595.2    | bdnf           | GGACACTTTCGAGCAGTCA     | CTCCAAAAGCACTTGG TTGC     |
| ENSDARG0000036074  | ZDB-GENE-020111-2    | NM_131885.2    | cebpA          | GGACACAGCAACCTCTACG     | GATCTGCTCAGTCTCTCAG       |
| ENSDARG0000028661  | ZDB-GENE-030616-82   | NM_001098242.1 | cntrf          | ACCACTGGCAACATGTGAA     | GACGTGCTCTCAGTAGTGG       |
| ENSDARG0000058285  | ZDB-GENE-041010-9    | NM_001005940.1 | cpt1b          | TATGACCGTTCACGCGAGA     | TACAGGCAGATGCGAGAG        |
| ENSDARG0000038918  | ZDB-GENE-070524-2    | NM_001135976.2 | drd1b          | GGAAACACGTTGTGTCTGTC    | CAAGGCCACCCAAACA TCG      |
| ENSDARG0000020850  | ZDB-GENE-990415-52   | NM_131263      | ef1a (eef1a11) | TTGAGAGAGAAATCGGTGGTCTG | GGACCGTGTGATTGAGGAAATTC   |
| ENSDARG0000010571  | ZDB-GENE-041111-259  | NM_001077279.1 | erh2           | AAATCGGAGAGGGTCTCTGT    | TCTGTGGAGCTGAACATGC       |
| ENSDARG0000017299  | ZDB-GENE-040912-132  | NM_001004682.1 | fabp11a        | TCAGGACCTTCAAAACA       | ACAAGTTTCCGCTTCTCGAT      |
| ENSDARG0000099555  | ZDB-GENE-061013-59   | NM_001077257.2 | foxo1          | TGAGCTGGAGTGCATCTTCG    | GTGAGGTGGAATCTCAGCCG      |
| ENSDARG0000013721  | ZDB-GENE-050309-17   | NM_001163806.1 | gpcr2          | ATAGCCTATCTTGGTGGCT     | GGAAATGACGCGCGATGAAG      |
| ENSDARG0000043457  | ZDB-GENE-030115-1    | NM_001115114   | gapdh          | GACTCCACCATGGAAGT       | TAATGTGGCTGGTCCCTC        |
| ENSDARG0000008840  | ZDB-GENE-040426-1375 | NM_201154      | hmb1a          | GTGTGGGAATTGCAACAAGTG   | CGAGGGCTGATGATGAGATA TTGC |
| ENSDARG0000008884  | ZDB-GENE-040426-1918 | NM_212986      | hprt1          | CAGCGATGAGGAGCAAGTTATG  | GTCCATGATGAGCCCGTAGG      |
| ENSDARG0000099351  | ZDB-GENE-021231-1    | NM_173283.3    | igfbp1a        | AGGCCAAAGTCAACGCATA     | TTGTCAAGGGCTGTCTGGAG      |
| ENSDARG0000035350  | ZDB-GENE-980526-110  | NM_131056.1    | ins            | CCCCAAGAGAGAGCGTTGAGC   | CAGCACTGCTCTACAATGCC      |
| ENSDARG0000011948  | ZDB-GENE-020503-3    | NM_001142672.1 | insra          | GATTCAGATGCGCGCAGAGA    | AGACCTTCCCACCTTTCT        |
| ENSDARG00000071524 | ZDB-GENE-020503-4    | NM_001123229.1 | insrb          | GGCCAGGATCAATTTGGGAT    | CCATGACAACCAATGTCCGC      |
| ENSDARG00000991085 | ZDB-GENE-081001-1    | NM_001128576   | lepa           | TTTTCAGCTCTCCGCTCAAC    | TGGTTGTTCAGCGGGAAT        |
| ENSDARG00000070961 | ZDB-GENE-080104-1    | NM_001309403   | lepr           | TTGGCTGGAATGGCAATATC    | GCTGAATCTCTGCTGTGGT       |
| ENSDARG0000087697  | ZDB-GENE-990415-139  | NM_131127.1    | lpl            | GGCCAAATTGTCACTGGT      | CATGAGGCCAAGACTGTAA       |
| ENSDARG0000098439  | ZDB-GENE-050410-7    | NM_00107545    | nr1h3 (lxra)   | AGACCAAGTCGCCCTACTCA    | GCTGCAATCGCTGGGTAT        |
| ENSDARG0000098439  | ZDB-GENE-050410-7    | NM_00107545.1  | mc4r           | CTGACCAACCGTGAGAGCAT    | TGGTAGCGCAAGAGCTAGAA      |
| ENSDARG0000015515  | ZDB-GENE-021223-2    | NM_173278.1    | ncor1          | AGGAGGAATCA TGCAGGCAA   | TGGGCTCTCTTTGGCTTTA       |
| ENSDARG0000020482  | ZDB-GENE-030131-713  | NM_201579      | nono           | ATGGACACACACCGATGCT     | AAATCTCCGAAGCCTTGCCA      |
| ENSDARG0000017180  | ZDB-GENE-030131-3161 | NM_001243875.1 | npcl           | CTGAGACCGTGGCCTCTCTT    | CCATCCGATTGGCCTCTGT       |
| ENSDARG0000036222  | ZDB-GENE-980526-438  | NM_131074.2    | npv            | GTGTGCTGGGGA GTCTCAC    | AGCGGTTGACCTTTTCCAT       |
| ENSDARG0000042824  | ZDB-GENE-030723-2    | NM_182889.1    | nr3c1          | CG ITTCGCAATGCGCTCAT    | GGAATGGAAGTGTGCTGGAT      |
| ENSDARG0000035285  | ZDB-GENE-040426-993  | NM_200276.2    | nfe2l2a (nrf2) | CCATGTCAATTCGATGATGTC   | TGAGATCGATGGAAGGTGGA      |
| ENSDARG0000098511  | ZDB-GENE-010126-2    | NM_001197161.2 | ntrk2b         | GCACTCCAGGTGTGAGGTAT    | CGACTGCAAGTCCATTTTTCG     |
| ENSDARG0000043135  | ZDB-GENE-030513-2    | NM_181438.3    | pomc           | ATGTTGTGCTCTGCTGGCT     | GGGTAGACGGGGGTTTCATC      |
| ENSDARG0000031777  | ZDB-GENE-041210-169  | NM_001161333.1 | pparaa         | CGACGACCTTCACTCTCT      | GAGATCCGGATGAGTCTCG       |
| ENSDARG0000054323  | ZDB-GENE-990415-211  | NM_001102567.1 | pparab         | GTGACCTCGCACTGTTTGTCT   | CTCTCGATTCGCTCGATA        |
| ENSDARG0000044525  | ZDB-GENE-990415-212  | NM_005168286.2 | pparda         | ATCGACCTTCTTCAACA       | AAGAGCCGCTCTTATCA         |
| ENSDARG0000009473  | ZDB-GENE-000112-47   | NM_131468.2    | ppardb         | CGTCAACACGCTACTCTGA     | GCCACAGGAGTCCATATCA       |
| ENSDARG0000031848  | ZDB-GENE-990415-213  | NM_131467.1    | pparg          | TACGAGACCAACCCCAACA     | GTATCTGCTGTGCTCTGTA       |
| ENSDARG0000057737  | ZDB-GENE-070314-2    | NM_001161551   | ppraa          | ACCCACTTCTCTACCAA       | CGAGTGTACACACCTAGT        |
| ENSDARG0000035819  | ZDB-GENE-070112-1762 | NM_001080174   | sirt3          | TCAGACACCAAGTGGAAATC    | CGTCAGGTGGGTGGTAAT        |
| ENSDARG0000035559  | ZDB-GENE-990415-270  | NM_131327.2    | tp53           | GGGCAATCAGCGAGCAA       | ACTGACCTTCTGAGTCTCCA      |
| ENSDARG0000023151  | ZDB-GENE-010503-1    | NM_199523.2    | ucp1           | GCCCTCTACGACAAAGCTGAA   | TGTATCGTCTGCCCAACC        |
| ENSDARG0000040925  | ZDB-GENE-980526-524  | NM_178219.2    | wnt10b         | CCGGATGATGGTCAACAATGCT  | TGGCACTTGCACTTCTGCT       |
| ENSDARG00000102464 | ZDB-GENE-980526-87   | NM_130937.1    | wnt5b          | CCCTCATCTGCTGCAACTCA    | TCTGACCCCTGAGATAGGCC      |

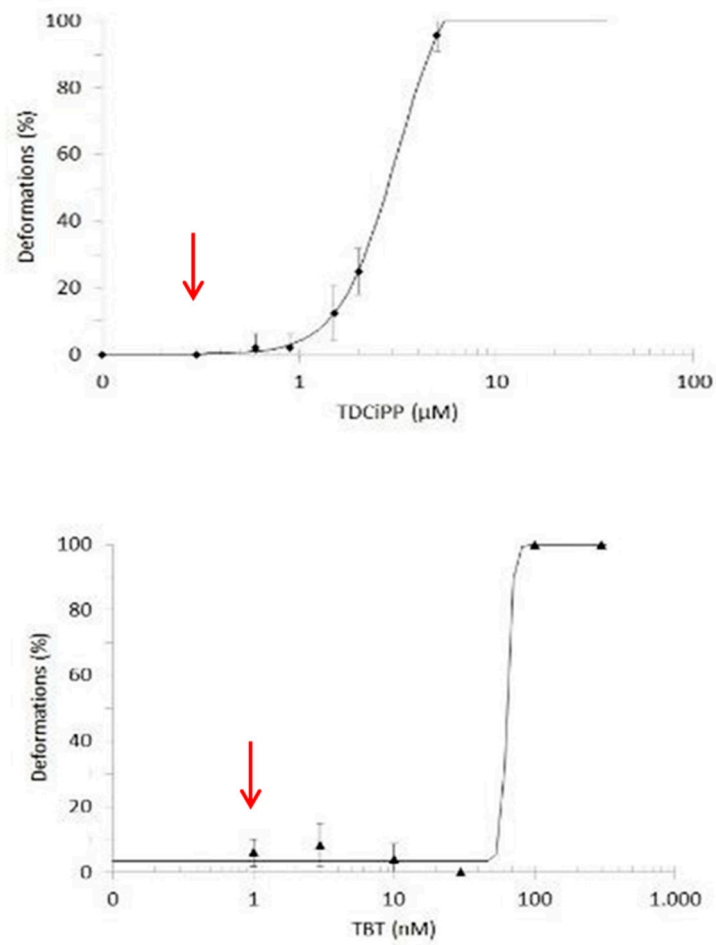

Figure S2. Dose-response curves for selected environmental chemicals, showing percentage of deformed larvae after exposure to (a) TDCiPP, (b) TBT. The red arrows indicate the non-toxic concentrations selected for this study.

Table S3. Overview of all adipocyte measurements of fish exposed to different environmental chemicals. All images made with SRS imaging can be found in the supplementary materials.

|                 | average number<br>of adipocytes | average volume<br>per fish in pL |
|-----------------|---------------------------------|----------------------------------|
| solvent control | 3.0                             | 229                              |
| TDCiPP          | 2.5                             | 25                               |
| TBT             | 4.6                             | 164                              |

| FISH ID   | number of<br>adipocytes | adipocyte<br>volume in pL | approximate<br>diameter in $\mu\text{m}$ | total volume per<br>fish in pL |
|-----------|-------------------------|---------------------------|------------------------------------------|--------------------------------|
| solvent 1 | 1                       | 80                        | 53                                       | 80                             |
| solvent 2 | 1                       | 209                       | 74                                       | 209                            |
| solvent 3 | 1                       | 90                        | 56                                       | 90                             |
| solvent 4 | 3                       | 58                        | 48                                       | 160                            |
|           |                         | 100                       | 58                                       |                                |
|           |                         | 1                         | 13                                       |                                |
| solvent 5 | 3                       | 3                         | 17                                       | 46                             |
|           |                         | 21                        | 34                                       |                                |
|           |                         | 23                        | 35                                       |                                |
| solvent 6 | 4                       | 71                        | 51                                       | 1235                           |
|           |                         | 70                        | 51                                       |                                |
|           |                         | 137                       | 64                                       |                                |
|           |                         | 958                       | 122                                      |                                |
| solvent 7 | 1                       | 4                         | 19                                       | 4                              |
| solvent 8 | 10                      | 0.1                       | 6                                        | 12                             |
|           |                         | 1                         | 13                                       |                                |
|           |                         | 3                         | 17                                       |                                |
|           |                         | 0.1                       | 6                                        |                                |
|           |                         | 1                         | 14                                       |                                |
|           |                         | 0.3                       | 8                                        |                                |
|           |                         | 0.1                       | 5                                        |                                |
|           |                         | 6                         | 22                                       |                                |
|           |                         | 0.1                       | 5                                        |                                |
|           |                         | 1                         | 12                                       |                                |
| TDCiPP 1  | 1                       | 26                        | 37                                       | 26                             |
| TDCiPP 2  | 4                       | 0.1                       | 5                                        | 16                             |
|           |                         | 8                         | 25                                       |                                |
|           |                         | 6                         | 22                                       |                                |
|           |                         | 2                         | 17                                       |                                |
| TDCiPP 3  | 1                       | 12                        | 29                                       | 12                             |
| TDCiPP 4  | 4                       | 0.6                       | 10                                       | 13                             |
|           |                         | 2                         | 16                                       |                                |
|           |                         | 0.03                      | 4                                        |                                |
|           |                         | 10                        | 27                                       |                                |
| TDCiPP 5  | 1                       | 7                         | 24                                       | 7                              |
| TDCiPP 6  | 6                       | 3                         | 19                                       | 34                             |
|           |                         | 1                         | 14                                       |                                |
|           |                         | 3                         | 17                                       |                                |
|           |                         | 3                         | 18                                       |                                |
|           |                         | 16                        | 31                                       |                                |
|           |                         | 7                         | 24                                       |                                |
| TDCiPP 7  | 1                       | 1                         | 12                                       | 1                              |
| TDCiPP 8  | 2                       | 78                        | 53                                       | 91                             |
|           |                         | 13                        | 29                                       |                                |
| TBT 1     | 2                       | 177                       | 70                                       | 216                            |
|           |                         | 39                        | 42                                       |                                |
| TBT 2     | 6                       | 169                       | 69                                       | 550                            |
|           |                         | 280                       | 81                                       |                                |

|       |    |      |    |     |
|-------|----|------|----|-----|
|       |    | 39   | 42 |     |
|       |    | 43   | 43 |     |
|       |    | 11   | 28 |     |
|       |    | 7    | 24 |     |
| TBT 3 | 3  | 1    | 12 | 8   |
|       |    | 5    | 21 |     |
|       |    | 2    | 16 |     |
| TBT 4 | 3  | 61   | 49 | 387 |
|       |    | 214  | 74 |     |
|       |    | 112  | 60 |     |
| TBT 5 | 14 | 12   | 28 | 61  |
|       |    | 0.2  | 8  |     |
|       |    | 5    | 21 |     |
|       |    | 1    | 13 |     |
|       |    | 26   | 37 |     |
|       |    | 0.3  | 9  |     |
|       |    | 0.4  | 9  |     |
|       |    | 0.4  | 9  |     |
|       |    | 0.6  | 10 |     |
|       |    | 11   | 28 |     |
|       |    | 1    | 13 |     |
|       |    | 0.05 | 4  |     |
|       |    | 0.5  | 10 |     |
|       |    | 2    | 15 |     |
| TBT 6 | 5  | 0.2  | 7  | 28  |
|       |    | 0.1  | 6  |     |
|       |    | 1    | 13 |     |
|       |    | 2    | 17 |     |
|       |    | 25   | 36 |     |
| TBT 7 | 2  | 0.5  | 10 | 48  |
|       |    | 47   | 45 |     |
| TBT 8 | 2  | 3    | 18 | 15  |
|       |    | 12   | 28 |     |
